# Supplementary material for: Modeling the role of p53 pulses in DNA damage- induced cell death decision
Source: Springer Nature journal article supplement (doi:10.1186/1471-2105-10-190), 2009-06-22
Supplement: 12859_2008_2920_MOESM3_ESM.pdf [file 12859_2008_2920_MOESM3_ESM.pdf]

---

**Table S2: Parameters for Bax activation module**

---

|                                                       |                                                           |
|-------------------------------------------------------|-----------------------------------------------------------|
| $k_{b1} = 0.1 \mu\text{M}^{-1}\cdot\text{min}^{-1}$   | $p_1 = 0.02 \mu\text{M}\cdot\text{min}^{-1}$              |
| $k_{b2} = 1 \mu\text{M}^{-1}\cdot\text{min}^{-1}$     | $p_2 = 0.002 \mu\text{M}\cdot\text{min}^{-1}$             |
| $k_{b3} = 0.001 \text{min}^{-1}$                      | $p_3 = 0.006 \mu\text{M}\cdot\text{min}^{-1}$             |
| $k_{b4} = 10 \mu\text{M}^{-1}\cdot\text{min}^{-1}$    | $p_4 = 0.002 \mu\text{M}\cdot\text{min}^{-1}$             |
| $k_{b5} = 0.06 \text{min}^{-1}$                       | $u_1 = 0.03 \text{min}^{-1}$                              |
| $k_{b6} = 0.5 \mu\text{M}^{-1}\cdot\text{min}^{-1}$   | $u_2 = 0.002 \text{min}^{-1}$                             |
| $k_{b7} = 0.01 \mu\text{M}^{-1}\cdot\text{min}^{-1}$  | $u_3 = 0.01 \text{min}^{-1}$                              |
| $k_{b8} = 0.001 \text{min}^{-1}$                      | $u_4 = 0.002 \text{min}^{-1}$                             |
| $k_{b9} = 0.1 \mu\text{M}^{-1}\cdot\text{min}^{-1}$   | $u_5 = 0.002 \text{min}^{-1}$                             |
| $k_{b10} = 0.001 \text{min}^{-1}$                     | $u_6 = 0.01 \text{min}^{-1}$                              |
| $k_{b11} = 0.5 \mu\text{M}^{-1}\cdot\text{min}^{-1}$  | $u_7 = 0.001 \text{min}^{-1}$                             |
| $k_{b12} = 0.05 \mu\text{M}^{-1}\cdot\text{min}^{-1}$ | $u_8 = 0.005 \text{min}^{-1}$                             |
| $k_{b13} = 10 \mu\text{M}^{-1}\cdot\text{min}^{-1}$   | $u_9 = 0.01 \text{min}^{-1}$                              |
| $k_{b14} = 0.5 \mu\text{M}^{-1}\cdot\text{min}^{-1}$  | $k_{\text{puma}} = 0.005 \mu\text{M}\cdot\text{min}^{-1}$ |
| $k_{b15} = 0.2 \mu\text{M}^{-1}\cdot\text{min}^{-1}$  | $K_f = 0.5 \mu\text{M}$                                   |
| $k_{b16} = 0.2 \mu\text{M}^{-1}\cdot\text{min}^{-1}$  |                                                           |
| $k_{b17} = 0.01 \text{min}^{-1}$                      |                                                           |

---

Parameters in Bax activation module are adopted from our previous work within one order of magnitude [28].
